# Supplementary material for: Monitoring sepsis using electrical cell profiling
Source: Royal Society of Chemistry journal article supplement (doi:10.1039/c6lc00940a), 2016-01-01
Supplement: c6lc00940a1.pdf [file c6lc00940a1.pdf]

### Supplementary Information:

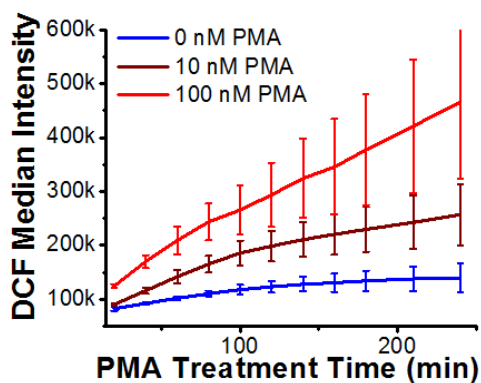

Figure S1: Fluorescent DCF is a result of the oxidation of DCFH-DA by the byproducts of the oxidative burst in neutrophils. The intensity of DCF over time increases for different PMA doses indicating granulocyte activation.

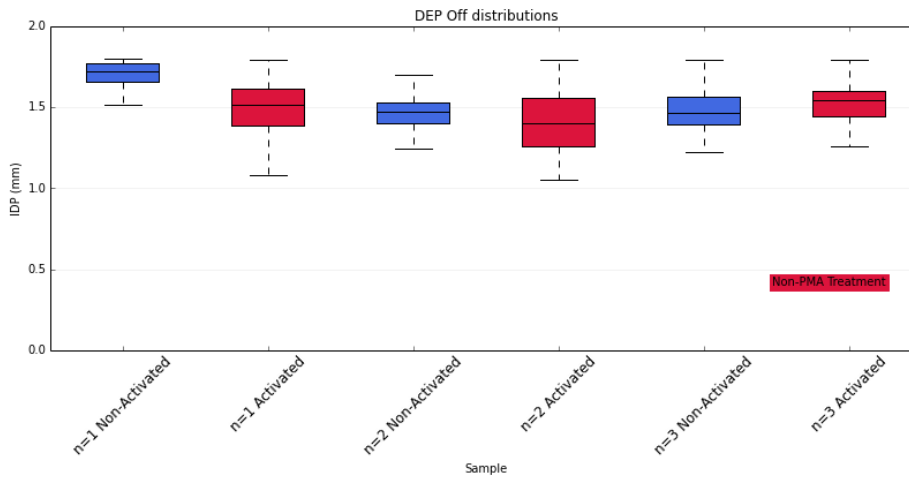

Figure S3: The IDP distributions of cells when DEP is OFF does not change significantly for PMA treated and no-treated cells across 3 different samples.

10

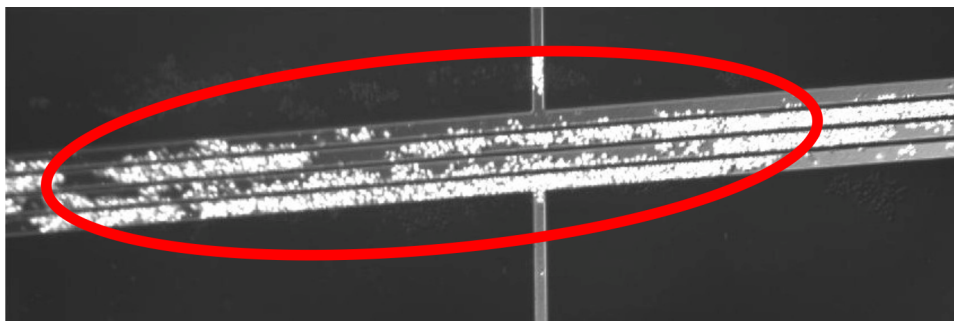

Figure S4: Cells from activated samples stick to the channel walls of the single-sided IDS.

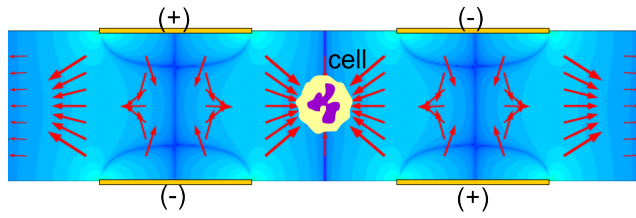

Figure S5: The resulting DEP force centers cells in the middle of the channel.

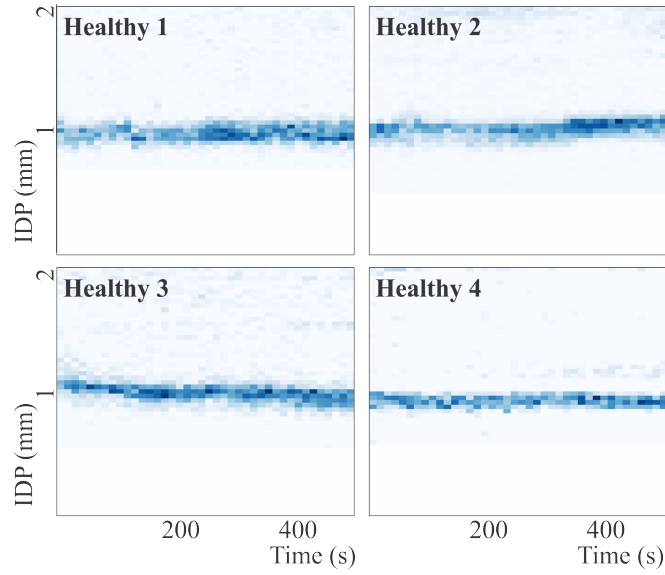

5 Figure S6: Density plots of the IDP of cells for samples obtained from 4 healthy mice. All samples show a consistent IDP throughout the experiment.
